# Supplementary material for: Diabetes, an independent poor prognostic factor of non-B non-C hepatocellular carcinoma, correlates with dihydropyrimidinase-like 3 promoter methylation
Source: PubMed Central journal article supplement (PMC6981134; doi:10.1038/s41598-020-57883-1), 2020-01-24
Supplement: 41598_2020_57883_MOESM1_ESM.pdf [file 41598_2020_57883_MOESM1_ESM.pdf]

# **Diabetes, an independent poor prognostic factor of non-B non-C hepatocellular carcinoma, correlates with dihydropyrimidinase-like 3 promoter methylation**

Satoko Umetsu<sup>1,2</sup>, Hiroki Mizukami<sup>1\*</sup>, Takeshi Saito<sup>1,2</sup>, Chiaki Uchida<sup>1,2</sup>, Akiko Igawa<sup>1,2</sup>, Kazuhiro Kudo<sup>1</sup>, Chieko Itabashi<sup>1</sup>, Sho Osonoi<sup>1</sup>, Guo Danyang<sup>1</sup>, Takanori Sasaki<sup>1</sup>, Soroku Yagihashi<sup>1</sup> and Kenichi Hakamada<sup>2</sup>

<sup>1</sup>Department of Pathology and Molecular Medicine, Hirosaki University Graduate School of Medicine, Hirosaki, Japan

<sup>2</sup>Department of Gastroenterological Surgery, Hirosaki University Graduate School of Medicine, Hirosaki, Japan,

\*Correspondence to Dr. H Mizukami, Department of Pathology and Molecular Medicine, Hirosaki University Graduate School of Medicine,

5 Zaifu-cho, Hirosaki, 036-8562 Japan

Phone 81-172-39-5025, Fax 81-172-39-5026, E-mail; [hirokim@hirosaki-u.ac.jp](mailto:hirokim@hirosaki-u.ac.jp)

Running Title; unfavorable outcome of non-B non-C hepatocellular carcinoma in diabetes

Main text: 3681 words

Disclosure: There is no conflict of interest in any of the listed authors

This study was supported in part by KAKENHI (Grants-in-Aid for Scientific Research) from the Japanese Ministry of Education, Culture, Sports, Science and Technology to HM (#18K08462)

**Supplemental Table S1. Univariate analysis of diabetes therapeutic factors and disease-specific survival after resection of NBNC hepatocellular carcinoma in diabetic patients (log-rank test).**

| <b>Variable</b>                             | <b>Median DSS (month)</b> | <b>P value</b> |
|---------------------------------------------|---------------------------|----------------|
| <b>Diet therapy: (-) vs (+)</b>             | 42.0 vs 45.5              | 0.676          |
| <b>Oral hypoglycemic agents: (-) vs (+)</b> | 44.0 vs 43.0              | 0.965          |
| <b>Metformin: (-) vs (+)</b>                | 41.0 vs 52.5              | 0.297          |
| <b>Insulin: (-) vs (+)</b>                  | 45.5 vs 37.0              | 0.308          |

**Supplemental Table S2. Univariate analysis of clinicopathological factors and overall survival after resection of NBNC hepatocellular carcinoma (log-rank test).**

| <b>Variable</b>                                                    | <b>Median OS (month)</b> | <b>P value</b> |
|--------------------------------------------------------------------|--------------------------|----------------|
| <b>Age: &lt;68 vs <math>\geq</math>68</b>                          | 56.5 vs 47.0             | 0.514          |
| <b>Male vs Female</b>                                              | 56.0 vs 47.5             | 0.582          |
| <b>BMI: &lt;23.9 vs <math>\geq</math>23.9</b>                      | 48.0 vs 52.0             | 0.479          |
| <b>Tumor multiplicity: single vs multiple</b>                      | 52.0 vs 45.5             | 0.015          |
| <b>Tumor size (mm):&lt;20 vs <math>\geq</math>20</b>               | 59.0 vs 47.5             | 0.304          |
| <b>Tumor differentiation: wel, mod vs por</b>                      | 47.5 vs 53.0             | 0.105          |
| <b>Growth type: Expansive growth vs invasive growth</b>            | 51.5 vs 46.0             | 0.976          |
| <b>Serosal infiltration: (-) vs (+)</b>                            | 53.0 vs 38.0             | 0.023          |
| <b>Formation of capsule: (-) vs (+)</b>                            | 69.5 vs 45.5             | 0.022          |
| <b>Infiltration to capsule: (-) vs (+)</b>                         | 59.0 vs 45.5             | 0.390          |
| <b>Septum formation: (-) vs (+)</b>                                | 59.0 vs 46.5             | 0.112          |
| <b>Bile duct invasion: (-) vs (+)</b>                              | 51.0 vs 52.0             | 0.787          |
| <b>Portal vein invasion: (-) vs (+)</b>                            | 54.0 vs 44.0             | 0.005          |
| <b>Hepatic vein invasion: (-) vs (+)</b>                           | 56.5 vs 43.0             | 0.001          |
| <b>T1-2 vs T3-4 (UICC)</b>                                         | 51.5 vs 41.0             | 0.404          |
| <b>Alcoholic liver damage: (-) vs (+)</b>                          | 51.5 vs 52.5             | 0.832          |
| <b>Alcohol habit: (-) vs (+)</b>                                   | 46.0 vs 54.0             | 0.228          |
| <b>History of T2DM: (-) vs (+)</b>                                 | 62.0 vs 43.0             | 0.007          |
| <b>HbA1c (%): &lt;6.1 vs <math>\geq</math>6.1</b>                  | 50.5 vs 47.0             | 0.745          |
| <b>Blood glucose (mmol/L): &lt;112.5 vs <math>\geq</math>112.5</b> | 60.0 vs 43.0             | 0.074          |
| <b>History of hypertension: (-) vs (+)</b>                         | 98.9 vs 73.0             | 0.092          |
| <b>History of dyslipidemia: (-) vs (+)</b>                         | 98.0 vs 47.0             | 0.083          |
| <b>Smoking habits (overall): (-) vs (+)</b>                        | 104.0 vs 98.0            | 0.947          |

**Supplemental Table S2. continued**

---

|                                                                          |               |       |
|--------------------------------------------------------------------------|---------------|-------|
| <b>Smoking habits (Brinkman index <math>\geq 400</math>): (-) vs (+)</b> | 104.0 vs 98.0 | 0.901 |
| <b>DPYSL3 promoter methylation: (-) vs (+)</b>                           | 62.0 vs 45.5  | 0.009 |
| <b>CDK2NA promoter methylation: (-) vs (+)</b>                           | 54.0 vs 43.0  | 0.552 |

---

OS; Overall survival, BMI; body mass index, T2DM; type2 diabetes, wel; well-differentiated adenocarcinoma, mod; moderate-differentiated adenocarcinoma, por; poorly-differentiated adenocarcinoma.

**Supplemental Table S3. Univariate analysis of diabetes therapeutic factors and overall survival after resection of NBNC hepatocellular carcinoma in diabetic patients (log-rank test).**

| <b>Variable</b>                             | <b>Median DSS (month)</b> | <b>P value</b> |
|---------------------------------------------|---------------------------|----------------|
| <b>Diet therapy: (-) vs (+)</b>             | 64.0 vs 51.0              | 0.98           |
| <b>Oral hypoglycemic agents: (-) vs (+)</b> | 47.0 vs 75.0              | 0.474          |
| <b>Metformin: (-) vs (+)</b>                | 61.0 vs 76.0              | 0.206          |
| <b>Insulin: (-) vs (+)</b>                  | 61.0 vs 36.0              | 0.788          |

**Supplemental Table S4. Multivariate analysis of clinicopathological factors and overall survival after resection of NBNC hepatocellular carcinoma (Cox proportional hazards model)**

| <b>Variable</b>              | <b>Hazard ratio</b> | <b>95%CI</b> | <b>P value</b> |
|------------------------------|---------------------|--------------|----------------|
| <b>Hepatic vein invasion</b> | 2.872               | 1.301–6.338  | 0.009          |
| <b>Serosal infiltration</b>  | 2.482               | 1.076–5.723  | 0.033          |
| <b>History of T2DM</b>       | 2.221               | 1.032–5.210  | 0.045          |

95% CI; confidence interval, T2DM; type2 diabetes.

# Supplemental Figure S1.

a

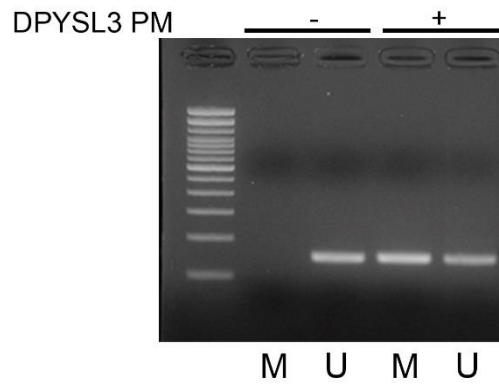

b

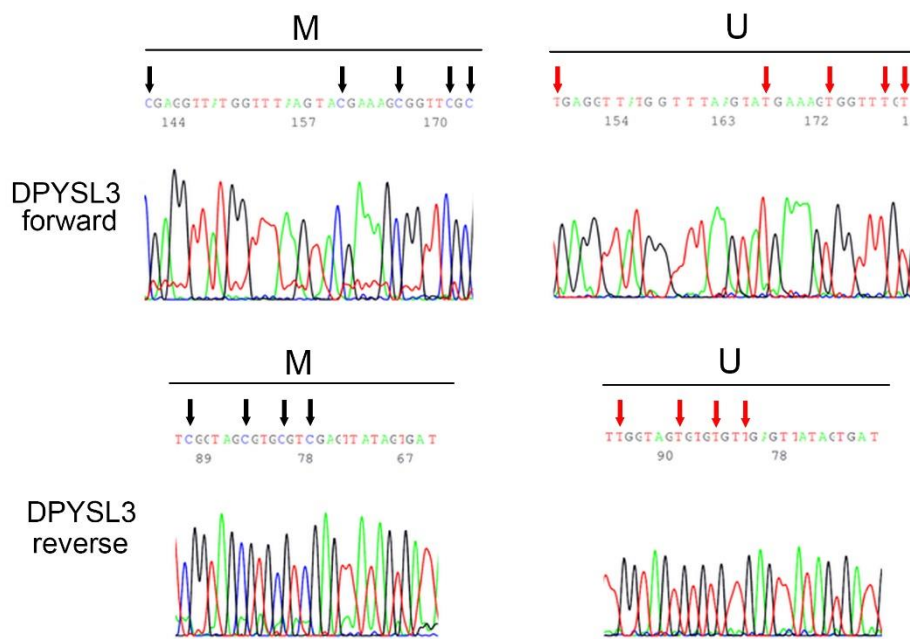

Supplemental Figure S2.

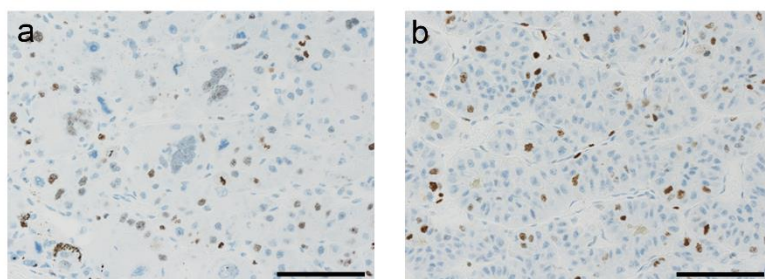

c

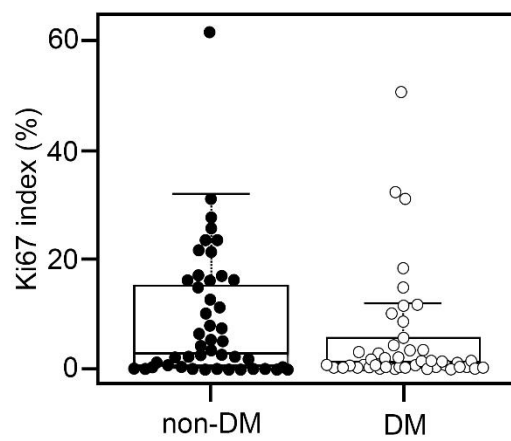



## **Legends for supplemental figures**

### **Supplemental Figure S1.**

#### **Analysis by methylation-specific PCR in NBNC-HCC.**

The subjects bearing promoter methylation (PM) of DPYSL3 showed methylated and unmethylated bands **(a)**. Non-methylated tumor exhibited only unmethylated band. U = unmethylated, M = methylated. Sequencing of the PCR amplicons indicated methylated base of cytosine as C (black arrows), whereas C in unmethylated DNA was converted to thymidine (T) after bisulfide treatment (red arrows) **(b)**. Lines under nucleotide sequence indicate primer sequence.

### **Supplemental Figure S2.**

#### **Cell proliferation analysis evaluated by Ki67 immunostaining**

Ki67 was positive in the nucleus of hepatocellular carcinoma cells in both non-DM cases **(a)** and DM cases **(b)**. Ki67 index was comparable between non-DM and DM **(c)**. Bar represents 50  $\mu$ m in each.
